# Supplementary material
Source: MDPI journal article supplement (https://www.mdpi.com/2304-8158/12/4/768)
Supplement: s1 [file s1]

Archive with 1 entries (1 files):
- foods-2199879-supplementary.pdf
