# Supplementary material for: Cation-Exchange Resin Applied to Paralytic Shellfish Toxins Depuration from Bivalves Exposed to Gymnodinium catenatum
Source: MDPI journal article supplement (doi:10.3390/foods12040768), 2023-02-10
Supplement: s1 [file s1 › foods-2199879-supplementary.pdf]

## Supporting information

# **Cation-exchange resin applied to Paralytic shellfish toxins depuration from bivalves exposed to *Gymnodinium catenatum***

Joana F. Leal<sup>1</sup>, Gabriel Bombo<sup>2</sup>, Patrícia S. M. Amado<sup>1</sup>, Hugo Pereira<sup>2</sup>, Maria L. S. Cristiano<sup>1\*</sup>

<sup>1</sup> Centre of Marine Sciences (CCMAR) and Department of Chemistry and Pharmacy, Faculty of Science and Technology – University of Algarve, Campus de Gambelas 8005-139 Faro, Portugal

<sup>2</sup> GreenCoLab – Associação Oceano Verde, Universidade do Algarve, Campus de Gambelas, 8005-139 Faro, Portugal

## **Materials and methods**

*Table S1 – Average size (length x width, in cm) of mussels Mytilus edulis used in the second set of experiments. The values inside the parentheses correspond to the standard deviation.*

| Tank 1              | Tank 2              | Tank 3              | Tank 4              | Tank 5              | Tank 6              |
|---------------------|---------------------|---------------------|---------------------|---------------------|---------------------|
| 6.4(0.7) x 3.8(0.4) | 6.2(0.7) x 4.0(0.5) | 6.2(0.6) x 3.8(0.5) | 6.4(0.7) x 4.0(0.5) | 6.6(0.9) x 4.4(0.9) | 6.4(0.6) x 3.9(0.6) |

*Table S2 – Average size (length x width, in cm) of mussels Mytilus edulis used in the third set of experiments. The values inside the parentheses correspond to the standard deviation.*

| Tank 1              | Tank 2              | Tank 3              | Tank 4              |
|---------------------|---------------------|---------------------|---------------------|
| 6.6(0.5) x 3.5(0.5) | 6.6(0.5) x 3.7(0.3) | 6.6(0.4) x 3.6(0.3) | 6.6(0.5) x 3.6(0.4) |

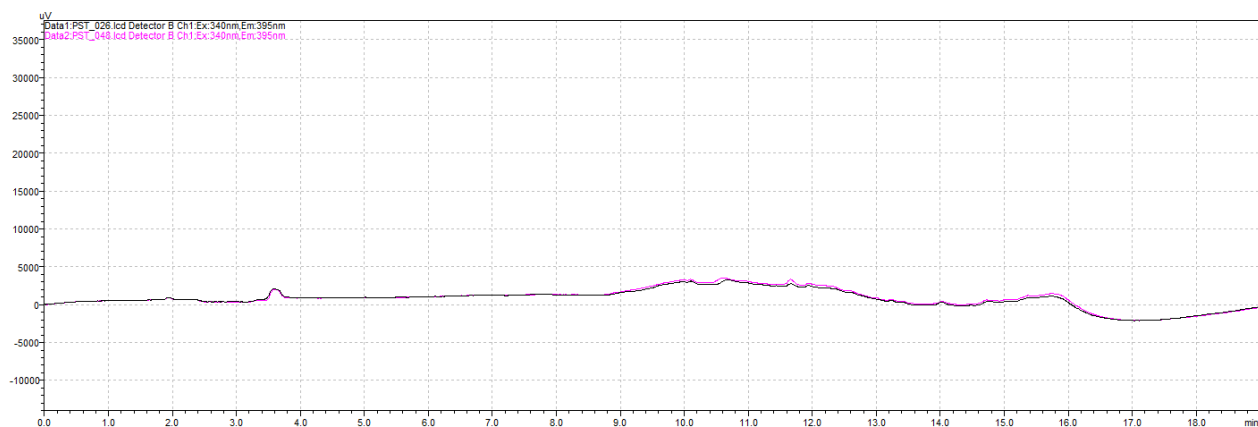

Figure S1 – Chromatograms of a chemical blank oxidized by peroxide (black) and periodate (pink)

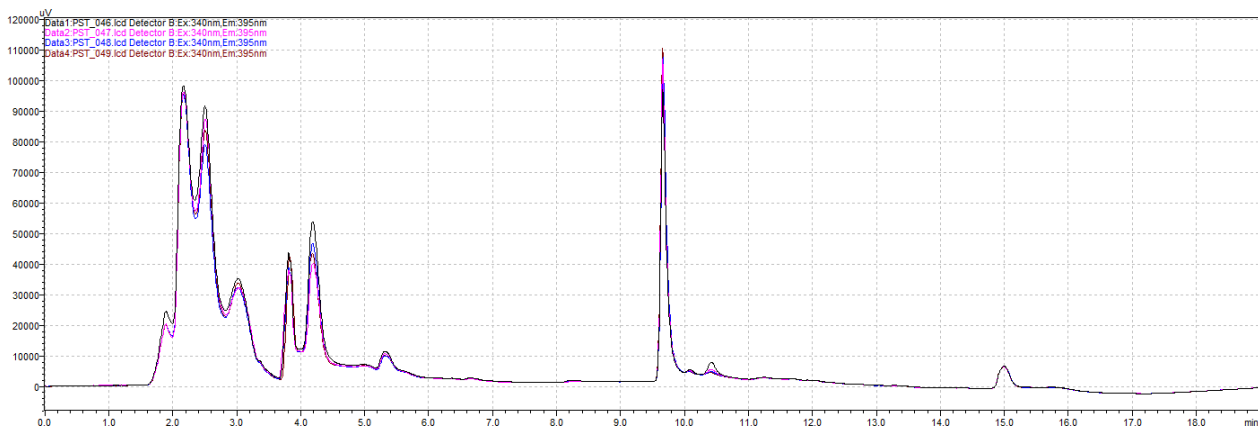

Figure S2 – Chromatograms of mussels' samples (*Mytilus edulis*) after SPE-C18, containing or not PST, not oxidized (procedure as in periodate oxidation, with matrix modifier). The products shown are naturally fluorescent co-extractives.

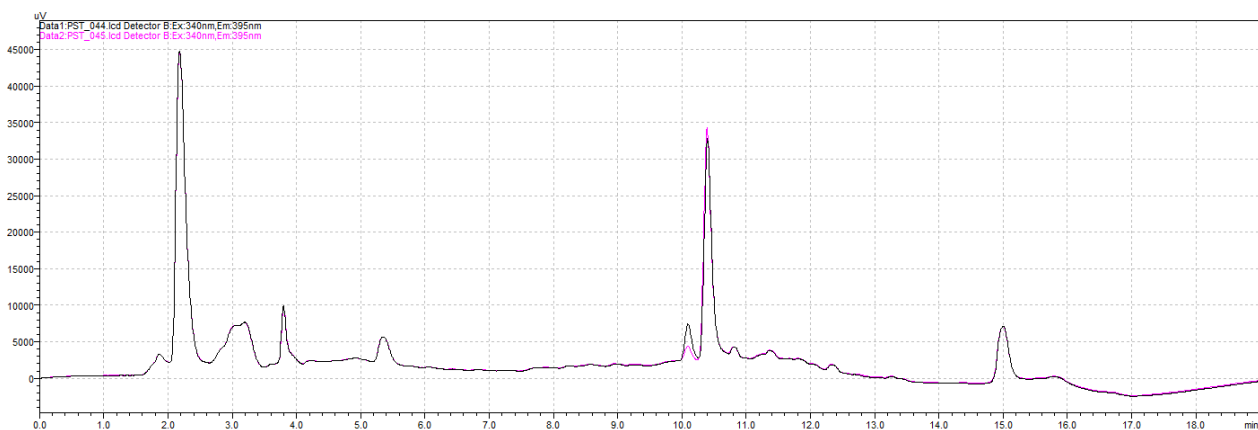

Figure S3 – Chromatograms of matrix modifier (prepared from oysters *Crassostrea gigas*), oxidised with periodate (PST-free sample).

## Results

### ➤ HPLC-FLD analysis

Table S3 – Method parameters: determination coefficient ( $R^2$ ), detection limit (LOD), quantification limit (LOQ).

| Toxin    | $R^2$         | LOD ( $\mu\text{M}$ )   | LOD ( $\mu\text{g STX.2HCl eqv/kg}$ ) * | LOQ ( $\mu\text{M}$ )   | LOQ ( $\mu\text{g STX.2HCl eqv/kg}$ ) * |
|----------|---------------|-------------------------|-----------------------------------------|-------------------------|-----------------------------------------|
| dcGTx2&3 | $\geq 0.9998$ | $\geq 0.005$            | $\geq 6$                                | $\geq 0.02$             | $\geq 21$                               |
| C1&2     | $\geq 0.9999$ | $\geq 0.003$            | $\geq 1$                                | $\geq 0.01$             | $\geq 3$                                |
| dcSTX    | $\geq 0.9993$ | $\geq 0.02$             | $\geq 63$                               | $\geq 0.07$             | $\geq 209$                              |
| GTx2&3   | $\geq 0.9996$ | $\geq 0.01$             | $\geq 25$                               | $\geq 0.05$             | $\geq 84$                               |
| GTx5     | $\geq 0.9999$ | $\geq 0.005$            | $\geq 1$                                | $\geq 0.02$             | $\geq 4$                                |
| STX      | $\geq 0.9981$ | $\geq 0.01$             | $\geq 34$                               | $\geq 0.04$             | $\geq 112$                              |
| GTx1&4   | $\geq 0.9990$ | $\geq 0.03$             | $\geq 169$                              | $\geq 0.09$             | $\geq 565$                              |
| NEO      | $\geq 0.9993$ | $\geq 0.02$<br>(0.05) † | $\geq 184$                              | $\geq 0.08$<br>(0.16) † | $\geq 615$                              |
| C3&4     | $\geq 0.9994$ | $\geq 0.01$<br>(0.03) † | $\geq 11$                               | $\geq 0.04$<br>(0.12) † | $\geq 36$                               |
| GTx6     | $\geq 0.9992$ | $\geq 0.02$             | $\geq 13$                               | $\geq 0.07$             | $\geq 43$                               |
| dcNEO    | $\geq 0.9984$ | $\geq 0.03$<br>(0.05) † | $\geq 97$                               | $\geq 0.11$<br>(0.18) † | $\geq 322$                              |

† For the toxins C3&4, NEO and dcNEO, the values between parenthesis correspond to the different values obtained from calibration curves constructed without matrix modifier (data only used in samples from *G. catenatum* cultures).

\* The conversion of the values in  $\mu\text{M}$  to  $\mu\text{g STX.2HCl eqv/Kg}$  was performed according to the following equation:

$$C_i(\mu\text{g STX.2HCl eqv/Kg}) = C_i(\mu\text{M}) \times \text{TEF} \times \text{MW (g/mol)} \times \frac{V_E(\text{mL})}{m_H(\text{g})} \times D_f \quad (\text{Eq. S1})$$

Where  $C_i$  is the concentration of each toxin; TEF is the toxicity equivalence factor for each toxin, according to EFSA; MW is the molecular weight of saxitoxin dihydrochloride (372.2 g/mol);  $V_E$  is the volume after the extraction (10 mL);  $m_H$  is the mussels' homogenised tissue (5.0 g);  $D_f$  is the dilution factor for each toxin throughout the procedure.

➤ **PST clearance in bivalves:**

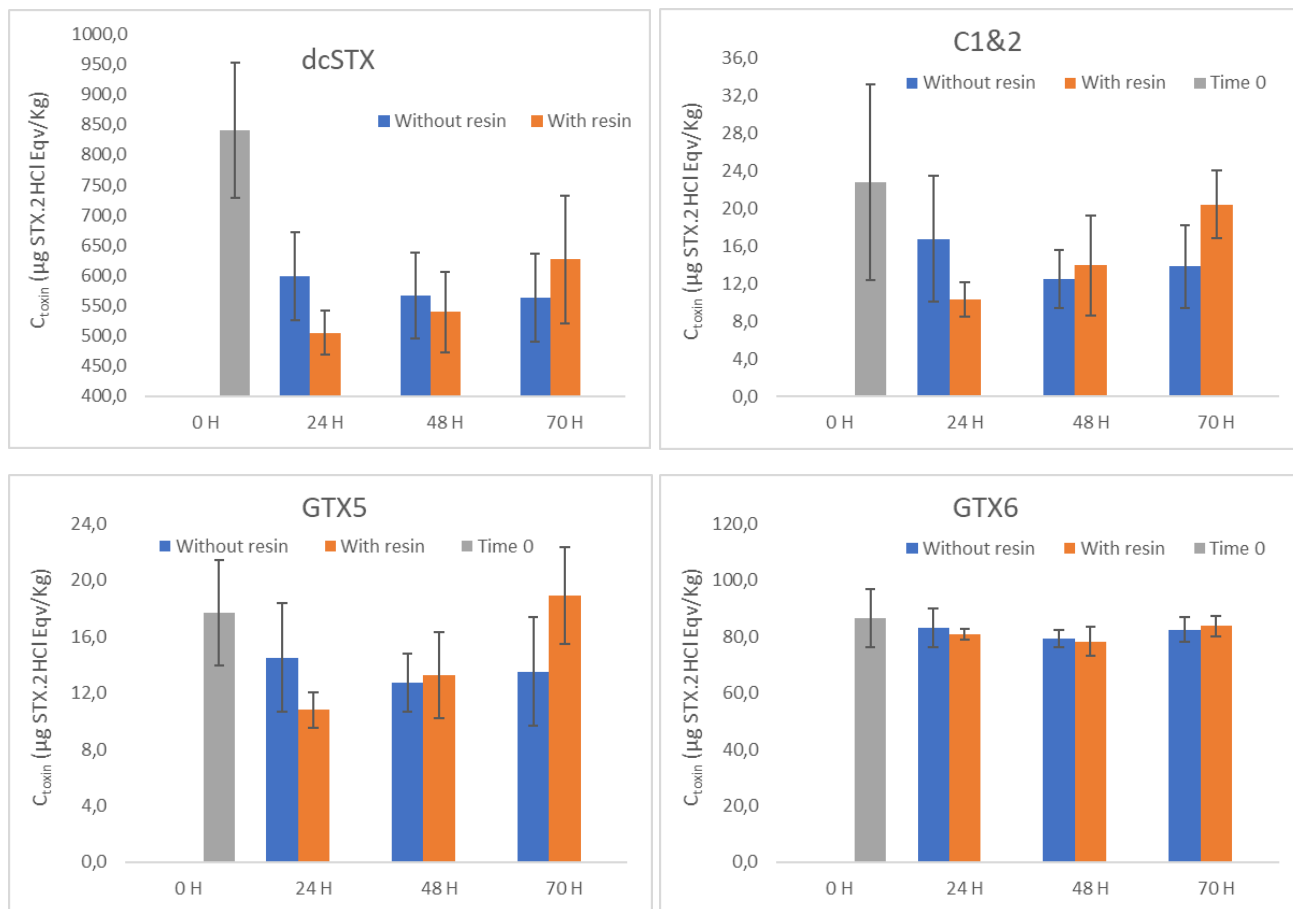

Figure S4 – Results of the PST clearance tests in live mussels (without resin and **with H-form resin**).

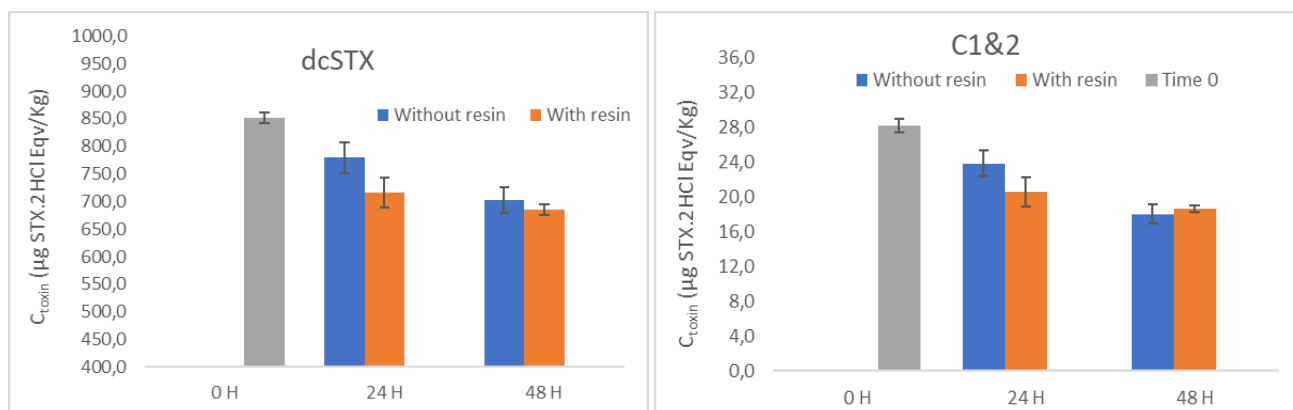

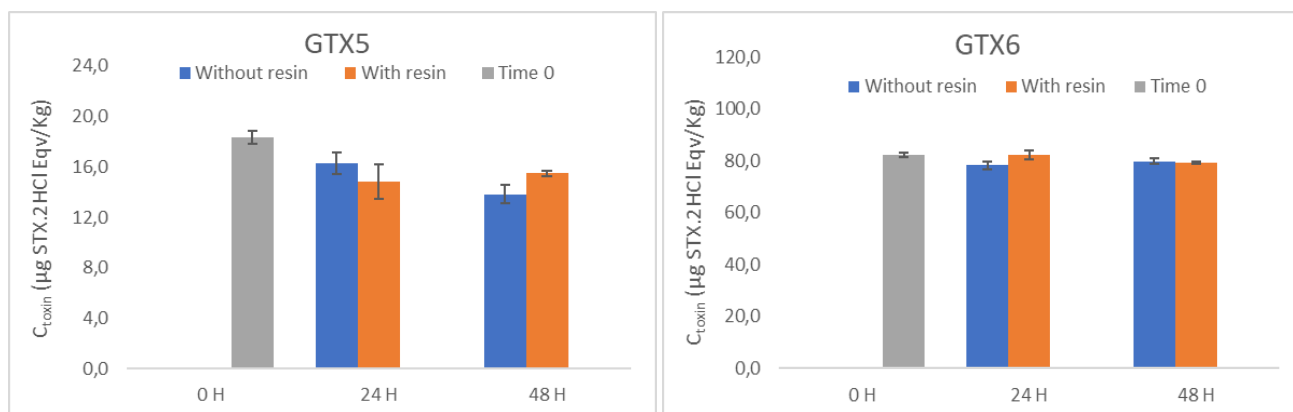

Figure S5 – Results of the PST clearance tests in live mussels (without resin and **with Na<sup>+</sup>-form resin**).

### ➤ PST concentrations

Table S4 – PST concentration, estimation in µg STX.2HCl eqv/Kg (average ± SD), in *G. catenatum* cultures, during removal studies using the H-form resin. At time 0 and 48-h control, no resin was present. Conversion from concentrations in µM were done using equation S1.

| Toxin         | T0 (0 h)    | T1 (1 h)      | T2 (3 h)    | T3 (19 h)   | T4 (26 h)  | T5 (48 h)  | C (48 h)    |
|---------------|-------------|---------------|-------------|-------------|------------|------------|-------------|
| <b>C1,2</b>   | 18.2 ± 0.9  | 18.6 ± 0.5    | 17.6 ± 0.2  | 18.5 ± 0.9  | 19.3 ± 0.4 | 18.7 ± 0.3 | 18.4 ± 0.9  |
| <b>dcSTX*</b> | 249.3 ± 1.2 | 104.6 ± 109.4 | 92.0 ± 96.1 | 45.9 ± 83.0 | ND         | ND         | 248.6 ± 4.5 |
| <b>GTX5</b>   | 6.7 ± 0.1   | 4.6 ± 0.3     | 4.7 ± 0.9   | 6.6 ± 0.1   | 4.6 ± 1.2  | 4.0 ± 1.5  | 7.1 ± 0.2   |
| <b>GTX6</b>   | 42.8 ± 1.2  | 42.9 ± 0.5    | 41.9 ± 0.8  | 43.2 ± 1.2  | 42.6 ± 0.9 | 41.6 ± 1.2 | 42.7 ± 2.2  |

\* For the calculation of the average and standard deviation, the value of zero was assigned when the toxins were not detected.

### ➤ H-form vs. Na<sup>+</sup>-form resins

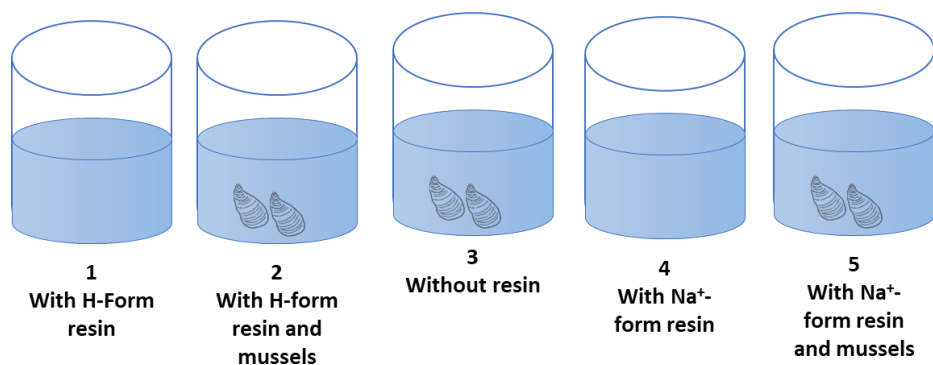

Figure S6 – Experimental design for the study of the pH-effect in in vivo experiments.
